# Supplementary material for: Exploring the Gas-Permeation Properties of Proton-Conducting Membranes Based on Protic Imidazolium Ionic Liquids: Application in Natural Gas Processing
Source: Membranes (Basel). 2018 Sep 5;8(3):75. doi: 10.3390/membranes8030075 (PMC6161093; doi:10.3390/membranes8030075)
Supplement: Supplementary file 1 [file membranes-08-00075-s001.pdf]

*Supplementary Materials*

# Exploring the Gas-Permeation Properties of Proton-Conducting Membranes Based on Protic Imidazolium Ionic Liquids: Application in Natural Gas Processing

**Parashuram Kallem**<sup>1,2,3</sup>, **Christophe Charmette**<sup>2</sup>, **Martin Drobek**<sup>2</sup>, **Anne Julbe**<sup>2</sup>, **Reyes Mallada**<sup>1,4</sup> and **Maria Pilar Pina**<sup>1,4,\*</sup>

<sup>1</sup> Department of Chemical & Environmental Engineering, Institute of Nanoscience of Aragon, University of Zaragoza, Edif. I+D+i, Campus Rio Ebro, C/Mariano Esquillor, 50018 Zaragoza, Spain; parshukallem@gmail.com (P.K.); rmallada@unizar.es (R.M.)

<sup>2</sup> IEM (Institut Européen des Membranes), UMR 5635 (CNRS-ENSCM-UM), Université de Montpellier, CC047, Place Eugène Bataillon, 34095 Montpellier, France; Christophe.Charmette@univ-montp2.fr (C.C.); martin.drobek@univ-montp2.fr (M.D.); anne.julbe@univ-montp2.fr (A.J.)

<sup>3</sup> School of Earth Sciences and Environmental Engineering, Gwangju Institute of Science and Technology (GIST), 261 Cheomdangwagi-ro, Buk-gu, Gwangju 61005, Korea.

<sup>4</sup> Networking Research Center on Bioengineering, Biomaterials and Nanomedicine, CIBER-BBN, 50018 Zaragoza, Spain.

\* Correspondence: mapina@unizar.es; Tel. +34-976-761155

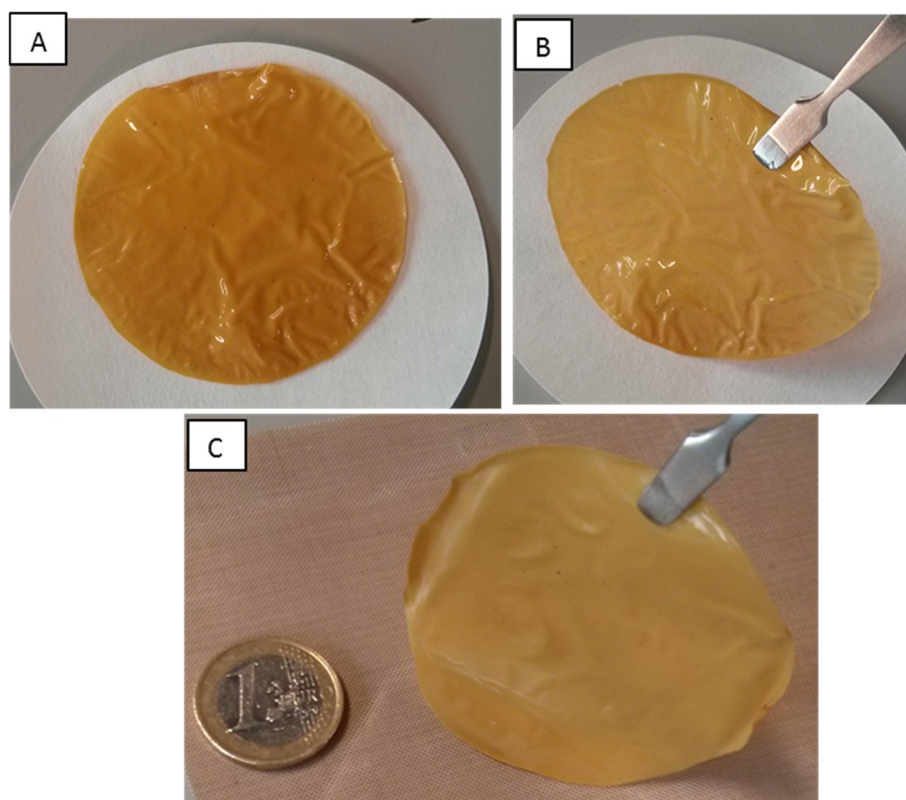

**Figure S1.** Photos of the prepared SILMs: A) IL based SILM (RPBI-IL); B) MIL based SILM (RPBI-MIL); C) PIL based SILM (RPBI-PIL).

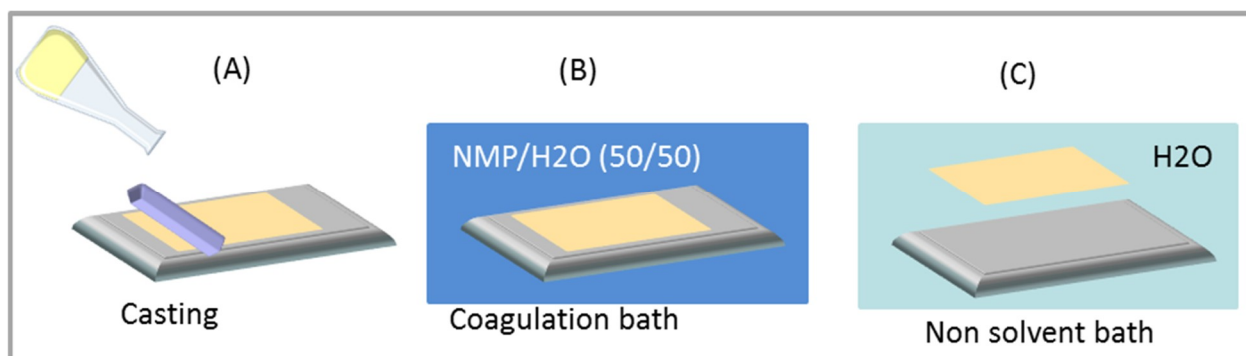

**Figure S2.** Schematic of the phase inversion steps: (A) polymer solution casting on clean glass plate; (B) System immersed in a coagulation bath with solvent mixture 50:50% of NMP: water; (C) Glass plate with the formed PBI support immersed into pure water.

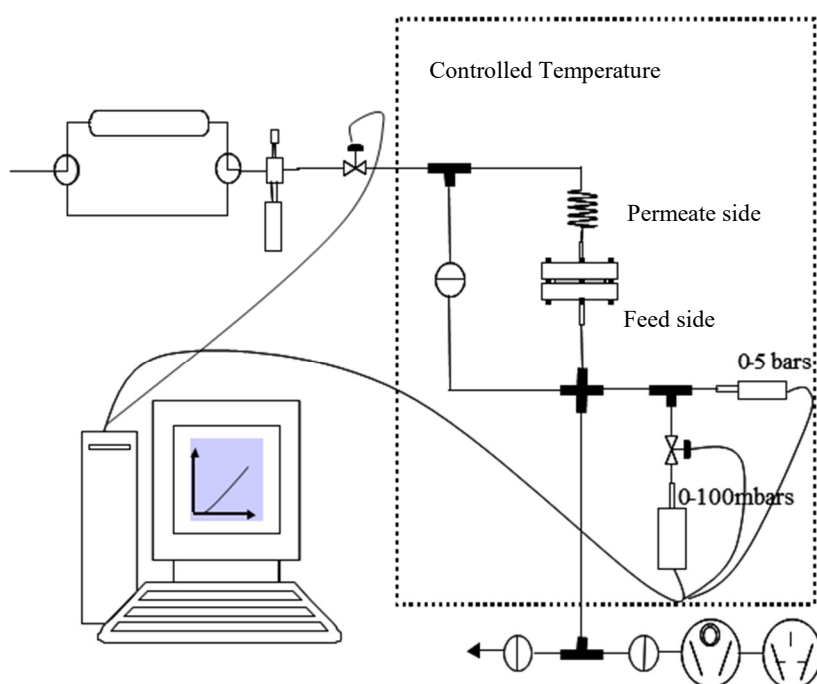

**Figure S3.** Schematic of the lab-scale experimental set-up used for single gas permeation measurements.
